# Supplementary material for: Test-retest reliability of a single isometric mid-thigh pull protocol to assess peak force and strength-endurance
Source: PeerJ. 2024 Aug 23;12:e17951. doi: 10.7717/peerj.17951 (PMC11348909; doi:10.7717/peerj.17951)
Supplement: Supplemental Information 1 [file peerj-12-17951-s001.xlsx]

## Sheet: Main data
participant	Test 1a Max	Test 1a Min	Fatigue1a_trial1	Test 1b Mean Max	Test 1b Mean Min	Fatigue1b_trial1	Test 2a Max	Test 2a Min	Fatigue1a_trial2	Test 2b Mean Max	Test 2b Mean Min	Fatigue1b_trial2	Test 3 Max	Test 3 Min	Fatigue2_trial1	Test 4 Max	Test 4 Min	Fatigue2_trial2
2	1125	1029	96	1082	1075	7	1188	1125	63	1169	1130	39	1162	809	353	1114	921	193
3	2751	2088	663	2622	2111	511	2515	2060	455	2452	2106	346	2554	1329	1225	2369	1656	713
4	1790	1446	344	1636	1468	168	1809	1521	288	1690	1562	128	1726	962	764	1558	1230	328
5	2050	1610	440	1934	1690	244	2083	1658	425	1922	1704	218	2013	1490	523	1973	1480	493
7	3099	2658	441	3016	2784	232	3156	2630	526	2895	2827	68	2654	2039	615	2934	1825	1109
6	2297	2111	186	2273	2141	132	2376	1932	444	2190	2068	122	2656	1321	1335	2284	1451	833
8	2353	1840	513	2273	1887	386	2247	1800	447	2165	1845	320	2046	1490	556	1900	1480	420
9	1621	1274	347	1527	1302	225	1493	1285	208	1455	1300	155	1634	1100	534	1320	935	385
10	2168	2123	45	2139	2166	-27	2347	2162	185	2206	2270	-64	2053	1487	566	2062	1424	638
12	2124	1650	474	2075	1732	343	2140	1724	416	2101	1818	283	2048	1353	695	2315	1441	874
13	2274	1804	470	2077	1823	254	2377	2010	367	2250	2210	40	2174	1454	720	2408	1465	943
14	1552	1417	135	1537	1425	112	1707	1282	425	1622	1377	245	1559	956	603	1498	911	587
15	2927	2330	597	2781	2472	309	2980	2571	409	2853	2625	228	2780	1654	1126	1872	1906	-34
16	2643	2383	260	2588	2482	106	2664	2405	259	2615	2496	119	2654	2043	611	2379	2049	330
17	1336	1171	165	1264	1181	83	1335	1105	230	1298	1159	139	1218	964	254	1280	918	362
18	2063	1845	218	1980	1918	62	2122	1702	420	2057	1857	200	1636	1182	454	1731	1277	454
19	2908	1801	1107	2758	1983	775	2869	1792	1077	2744	1975	769	2890	1901	989	2644	1892	752
20	1106	976	130	1078	1007	71	1087	977	110	1055	996	59	1098	768	330	1083	843	240
21	1984	1710	274	1910	1746	164	2081	1825	256	1995	1905	90	2082	1344	738	1808	1500	308
22	1590	1435	155	1438	1490	-52	1693	1327	366	1611	1388	223	1623	986	637	1428	1012	416
23	1396	1286	110	1380	1343	37	1568	1501	67	1521	1562	-41	1621	1058	563	1459	1029	430
24	2592	2500	92	2494	2525	-31	2742	2373	369	2635	2486	149	2659	1721	938	2644	1672	972
25	2102	1841	261	2073	1927	146	2101	1875	226	2080	1949	131	2122	1675	447	2043	1543	500
26	1457	1191	266	1381	1222	159	1481	1381	100	1369	1429	-60	1348	748	600	1394	1035	359
27	1204	1053	151	1143	1101	42	1124	1102	22	1093	1124	-31	1219	900	319	1238	884	354
28	1494	1443	51	1480	1469	11	1518	1412	106	1475	1451	24	1380	893	487	1537	754	783
29	2164	1790	374	2059	1903	156	2173	1784	389	2069	1923	146	1957	1432	525	2015	1712	303
30	1881	1791	90	1907	1706	201	1861	1816	45	1892	1719	173	1519	991	528	1596	946	650
	2001.82	1699.86	301.964	1925.18	1752.82	172.357	2029.89	1719.18	310.714	1945.68	1795.04	150.643	1931.61	1287.5	644.107	1853.07	1328.25	524.821
	568.322	455.17	232.468	549.083	474.522	177.608	568.309	449.326	211.94	533.526	482.243	162.963	542.887	378.056	265.647	504.247	376.508	267.821
			15.0845			8.95279			15.3069			7.74243			33.3457			28.3217

## Sheet: Protocol 1
	Test 1	Test 2		Diff
2	1065	1163	1114	98
	1125	1188	1156.5	63
	1056	1156	1106	100
	1079	1177	1128	98
	1076	1155	1115.5	79
	1055	1168	1111.5	113
	1080	1153	1116.5	73
	1097	1135	1116	38
	1029	1131	1080	102
	1100	1125	1112.5	25
3	2751	2502	2626.5	-249
	2610	2515	2562.5	-95
	2506	2340	2423	-166
	2415	2403	2409	-12
	2289	2150	2219.5	-139
	2208	2268	2238	60
	2239	2142	2190.5	-97
	2138	2060	2099	-78
	2109	2102	2105.5	-7
	2088	2156	2122	68
4	1790	1809	1799.5	19
	1570	1660	1615	90
	1548	1600	1574	52
	1540	1505	1522.5	-35
	1592	1564	1578	-28
	1505	1542	1523.5	37
	1537	1611	1574	74
	1446	1540	1493	94
	1499	1521	1510	22
	1459	1626	1542.5	167
5	2050	2083	2066.5	33
	1900	1866	1883	-34
	1852	1817	1834.5	-35
	1843	1865	1854	22
	1709	1663	1686	-46
	1702	1735	1718.5	33
	1566	1609	1587.5	43
	1713	1702	1707.5	-11
	1746	1752	1749	6
	1610	1658	1634	48
6	2276	2351	2313.5	75
	2297	2067	2182	-230
	2246	2154	2200	-92
	2274	2047	2160.5	-227
	2246	2213	2229.5	-33
	2236	2376	2306	140
	2160	2159	2159.5	-1
	2166	1949	2057.5	-217
	2111	2322	2216.5	211
	2147	1932	2039.5	-215
7	3099	3156	3127.5	57
	3044	2695	2869.5	-349
	2904	2835	2869.5	-69
	2918	2746	2832	-172
	2270	2798	2534	528
	2929	2619	2774	-310
	2874	2766	2820	-108
	2658	2630	2644	-28
	2805	2722	2763.5	-83
	2889	3129	3009	240
8	2293	2247	2270	-46
	2353	2156	2254.5	-197
	2172	2092	2132	-80
	2080	2070	2075	-10
	2000	1966	1983	-34
	2135	1978	2056.5	-157
	1956	1980	1968	24
	1947	1855	1901	-92
	1875	1800	1837.5	-75
	1840	1881	1860.5	41
9	1621	1493	1557	-128
	1480	1461	1470.5	-19
	1479	1411	1445	-68
	1428	1399	1413.5	-29
	1405	1373	1389	-32
	1257	1363	1310	106
	1288	1312	1300	24
	1343	1285	1314	-58
	1274	1303	1288.5	29
	1290	1311	1300.5	21
10	2168	2347	2257.5	179
	2152	2168	2160	16
	2096	2103	2099.5	7
	2149	2340	2244.5	191
	2095	2255	2175	160
	2090	2157	2123.5	67
	2065	2124	2094.5	59
	2225	2162	2193.5	-63
	2149	2248	2198.5	99
	2123	2399	2261	276
12	2124	2112	2118	-12
	2044	2140	2092	96
	2058	2050	2054	-8
	1987	1987	1987	0
	1887	1833	1860	-54
	1972	1937	1954.5	-35
	1698	1787	1742.5	89
	1734	1840	1787	106
	1650	1724	1687	74
	1813	1890	1851.5	77
13	2274	2377	2325.5	103
	2029	2080	2054.5	51
	1929	2294	2111.5	365
	1778	2210	1994	432
	1945	1880	1912.5	-65
	1659	1976	1817.5	317
	1773	2071	1922	298
	1819	2010	1914.5	191
	1804	2169	1986.5	365
	1846	2452	2149	606
14	1552	1707	1629.5	155
	1534	1481	1507.5	-53
	1525	1677	1601	152
	1471	1324	1397.5	-147
	1427	1570	1498.5	143
	1409	1368	1388.5	-41
	1474	1570	1522	96
	1434	1291	1362.5	-143
	1417	1559	1488	142
	1424	1282	1353	-142
15	2927	2980	2953.5	53
	2746	2812	2779	66
	2671	2766	2718.5	95
	2434	2717	2575.5	283
	2557	2539	2548	-18
	2566	2447	2506.5	-119
	2565	2529	2547	-36
	2534	2602	2568	68
	2330	2571	2450.5	241
	2551	2702	2626.5	151
16	2587	2664	2625.5	77
	2643	2648	2645.5	5
	2534	2534	2534	0
	2534	2614	2574	80
	2518	2553	2535.5	35
	2578	2576	2577	-2
	2478	2531	2504.5	53
	2383	2405	2394	22
	2531	2456	2493.5	-75
	2531	2628	2579.5	97
17	1336	1335	1335.5	-1
	1253	1323	1288	70
	1204	1236	1220	32
	1252	1237	1244.5	-15
	1238	1218	1228	-20
	1225	1213	1219	-12
	1218	1203	1210.5	-15
	1171	1113	1142	-58
	1182	1105	1143.5	-77
	1190	1258	1224	68
18	1904	2030	1967	126
	1974	2122	2048	148
	2063	2020	2041.5	-43
	1920	1902	1911	-18
	1871	1903	1887	32
	1941	1802	1871.5	-139
	1952	1686	1819	-266
	1912	1939	1925.5	27
	1845	1932	1888.5	87
	1996	1702	1849	-294
19	2908	2869	2888.5	-39
	2839	2801	2820	-38
	2527	2561	2544	34
	2118	2109	2113.5	-9
	1989	1988	1988.5	-1
	2042	2012	2027	-30
	1897	1889	1893	-8
	1961	1971	1966	10
	1801	1792	1796.5	-9
	2188	2162	2175	-26
20	1106	1020	1063	-86
	1076	1058	1067	-18
	1051	1087	1069	36
	1048	1045	1046.5	-3
	1021	1102	1061.5	81
	992	1025	1008.5	33
	957	1013	985	56
	976	977	976.5	1
	1040	996	1018	-44
	1006	1015	1010.5	9
21	1984	2081	2032.5	97
	1889	1984	1936.5	95
	1858	1921	1889.5	63
	1886	1904	1895	18
	1714	1793	1753.5	79
	1716	1890	1803	174
	1705	1828	1766.5	123
	1710	1881	1795.5	171
	1735	1825	1780	90
	1793	2009	1901	216
22	1300	1693	1496.5	393
	1423	1648	1535.5	225
	1590	1491	1540.5	-99
	1661	1463	1562	-198
	1568	1551	1559.5	-17
	1331	1445	1388	114
	1501	1551	1526	50
	1567	1327	1447	-240
	1467	1338	1402.5	-129
	1435	1498	1466.5	63
23	1396	1427	1411.5	31
	1389	1568	1478.5	179
	1354	1568	1461	214
	1354	1464	1409	110
	1338	1443	1390.5	105
	1297	1436	1366.5	139
	1263	1555	1409	292
	1389	1654	1521.5	265
	1355	1533	1444	178
	1286	1501	1393.5	215
24	2592	2580	2586	-12
	2469	2582	2525.5	113
	2421	2742	2581.5	321
	2455	2820	2637.5	365
	2424	2634	2529	210
	2443	2701	2572	258
	2369	2581	2475	212
	2552	2599	2575.5	47
	2500	2373	2436.5	-127
	2523	2485	2504	-38
25	2086	2101	2093.5	15
	2102	2064	2083	-38
	2030	2074	2052	44
	2041	1991	2016	-50
	2106	2096	2101	-10
	1976	2015	1995.5	39
	1893	1941	1917	48
	1897	1906	1901.5	9
	1841	1875	1858	34
	2042	2065	2053.5	23
26	1457	1481	1469	24
	1385	1342	1363.5	-43
	1302	1283	1292.5	-19
	1343	1434	1388.5	91
	1366	1345	1355.5	-21
	1287	1318	1302.5	31
	1234	1346	1290	112
	1191	1381	1286	190
	1231	1440	1335.5	209
	1243	1466	1354.5	223
27	1125	1041	1083	-84
	1204	1124	1164	-80
	1099	1115	1107	16
	1149	1002	1075.5	-147
	1141	1088	1114.5	-53
	1194	1125	1159.5	-69
	1124	1139	1131.5	15
	1135	1120	1127.5	-15
	1114	1102	1108	-12
	1053	1150	1101.5	97
28	1494	1518	1506	24
	1481	1436	1458.5	-45
	1465	1472	1468.5	7
	1501	1496	1498.5	-5
	1510	1513	1511.5	3
	1514	1495	1504.5	-19
	1521	1547	1534	26
	1443	1449	1446	6
	1462	1412	1437	-50
	1503	1491	1497	-12
29	1912	1926	1919	14
	2164	2173	2168.5	9
	2101	2109	2105	8
	2033	2044	2038.5	11
	1789	1802	1795.5	13
	1720	1750	1735	30
	1821	1807	1814	-14
	1790	1784	1787	-6
	1874	1911	1892.5	37
	2044	2075	2059.5	31
30	1618	1640	1629	22
	1709	1701	1705	-8
	1791	1816	1803.5	25
	1918	1964	1941	46
	2000	2009	2004.5	9
	1989	1952	1970.5	-37
	1856	1827	1841.5	-29
	1881	1861	1871	-20
	1934	1923	1928.5	-11
	1907	1891	1899	-16
				31.2893
				127.187
			Upper	280.575
			Lower	-217.997
	1820.3	1851.59
	499.578	500.129
	27.4448	27.0107

## Sheet: Fatigue data_BA
Fatigue1a_trial1	Fatigue1a_trial2	Mean	Diff	Fatigue1b_trial1	Fatigue1b_trial2	Mean	Diff	Fatigue2_trial1	Fatigue2_trial2	Mean	Diff
96	63	79.5	33	7	39	23	-32	353	193	273	160
663	455	559	208	511	346	428.5	165	1225	713	969	512
344	288	316	56	168	128	148	40	764	328	546	436
440	425	432.5	15	244	218	231	26	523	493	508	30
441	526	483.5	-85	232	68	150	164	615	1109	862	-494
186	444	315	-258	132	122	127	10	1335	833	1084	502
513	447	480	66	386	320	353	66	556	420	488	136
347	208	277.5	139	225	155	190	70	534	385	459.5	149
45	185	115	-140	-27	-64	-45.5	37	566	638	602	-72
474	416	445	58	343	283	313	60	695	874	784.5	-179
470	367	418.5	103	254	40	147	214	720	943	831.5	-223
135	425	280	-290	112	245	178.5	-133	603	587	595	16
597	409	503	188	309	228	268.5	81	1126	-34	546	1160
260	259	259.5	1	106	119	112.5	-13	611	330	470.5	281
165	230	197.5	-65	83	139	111	-56	254	362	308	-108
218	420	319	-202	62	200	131	-138	454	454	454	0
1107	1077	1092	30	775	769	772	6	989	752	870.5	237
130	110	120	20	71	59	65	12	330	240	285	90
274	256	265	18	164	90	127	74	738	308	523	430
155	366	260.5	-211	-52	223	85.5	-275	637	416	526.5	221
110	67	88.5	43	37	-41	-2	78	563	430	496.5	133
92	369	230.5	-277	-31	149	59	-180	938	972	955	-34
261	226	243.5	35	146	131	138.5	15	447	500	473.5	-53
266	100	183	166	159	-60	49.5	219	600	359	479.5	241
151	22	86.5	129	42	-31	5.5	73	319	354	336.5	-35
51	106	78.5	-55	11	24	17.5	-13	487	783	635	-296
374	389	381.5	-15	156	146	151	10	525	303	414	222
90	45	67.5	45	201	173	187	28	528	650	589	-122
			-8.75				21.7143				119.286
			138.31				109.759				314.54
		Upper	262.338			Upper	236.842			Upper	735.784
		Bias	-8.75			Bias	21.7143			Bias	119.286
		Lower	-279.838			Lower	-193.414			Lower	-497.212
		-100	262.338	-8.75	-279.838	-100	236.842	21.7143	-193.414	-100	735.784	119.286	-497.212
		1100	262.338	-8.75	-279.838	1100	236.842	21.7143	-193.414	1100	735.784	119.286	-497.212
